# Supplementary material
Source: publisher site journal article supplement (https://www.dovepress.com/article/494589)
Supplement: Supplementary file 1 [file get_supplementary_file.php]

Objective neurophysiological measures of cognitive performance in elite ice hockey players – **Supplementary 1**

***Supplementary 1:*** *Brain vital signs for All-Star combine players*

**Supplementary Table 1:** Brain vital signs for All-Star combine players – league-wide scan [mean (standard deviation)]

| Brain vital signs | Forwards | Defense |
| --- | --- | --- |
| N100 Amplitude | 3.09 (1.63) | 2.79 (1.53) |
| N100 Latency | 96.05 (20.03) | 114.58 (36.14) |
| P300 Amplitude | 3.84 (2.22) | 4.25 (2.04) |
| P300 Latency | 260.45 (41.44) | 263.42 (41.68) |
| N400 Amplitude | 2.02 (1.00) | 1.76 (0.93) |
| N400 Latency | 438.95 (96.48) | 445.75 (56.68) |

**Supplementary Table 2:** Brain vital signs for All-Star combine players – All-Star combine scan [mean (standard deviation)]

| Brain vital signs | Forwards | Defense |
| --- | --- | --- |
| N100 Amplitude | 2.92 (1.67) | 2.47 (1.34) |
| N100 Latency | 95.36 (19.77) | 111.00 (35.21) |
| P300 Amplitude | 4.16 (2.10) | 4.53 (1.68) |
| P300 Latency | 262.91 (30.45) | 267.25 (33.65) |
| N400 Amplitude | 2.49 (1.34) | 1.96 (0.75) |
| N400 Latency | 396.77 (61.52) | 455.67 (68.96) |

**Supplementary Table 3:** Brain vital signs for All-Star combine players – collapsed across scans [mean (standard deviation)]

| Brain vital signs | Forwards | Defense |
| --- | --- | --- |
| N100 Amplitude | 3.00 (1.61) | 2.63 (1.39) |
| N100 Latency | 95.70 (19.45) | 112.79 (34.21) |
| P300 Amplitude | 4.00 (2.11) | 4.39 (1.79) |
| P300 Latency | 261.68 (35.54) | 265.33 (36.32) |
| N400 Amplitude | 2.26 (1.18) | 1.86 (0.81) |
| N400 Latency | 417.86 (81.82) | 450.71 (60.63) |
